# Supplementary material for: Primary mapping of quantitative trait loci regulating multivariate horticultural phenotypes of watermelon (Citrullus lanatus L.)
Source: Frontiers journal article supplement (doi:10.3389/fpls.2022.1034952), 2023-01-12
Supplement: Data_Sheet_1.ZIP [file Data_Sheet_1.ZIP]

**Supplementary Figures**


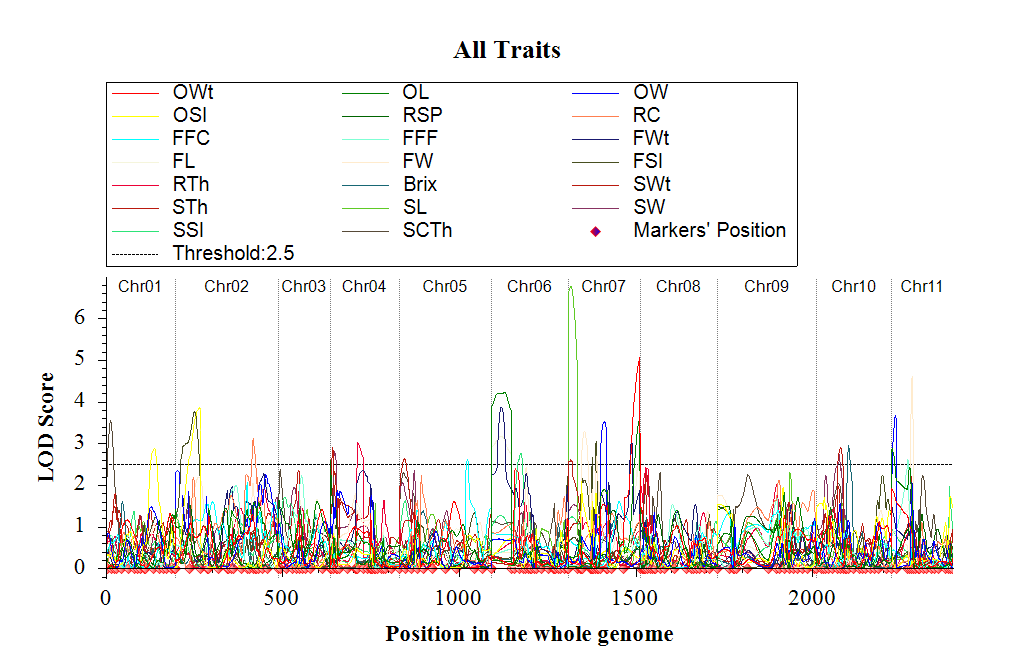


**Supplementary Figure S1 |** The LOD score distribution plot for QTL mapping of all trait.


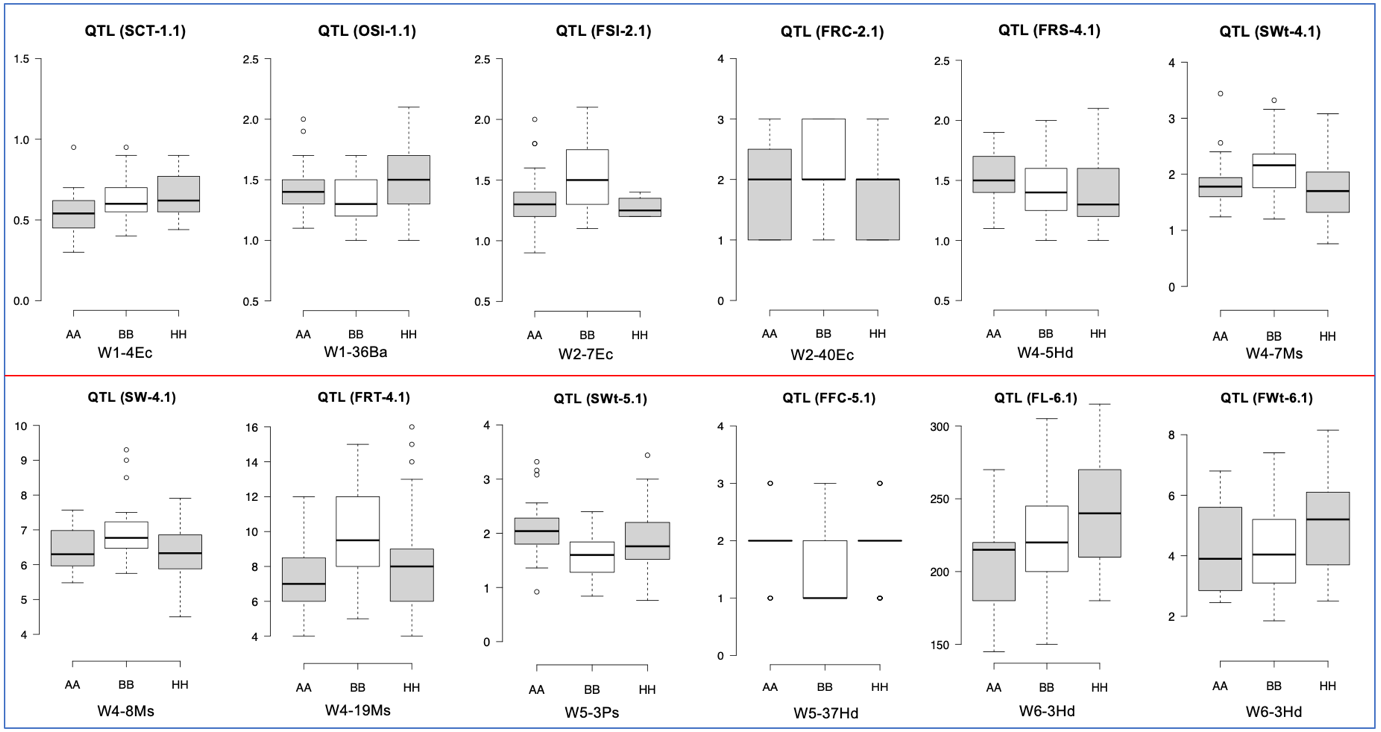


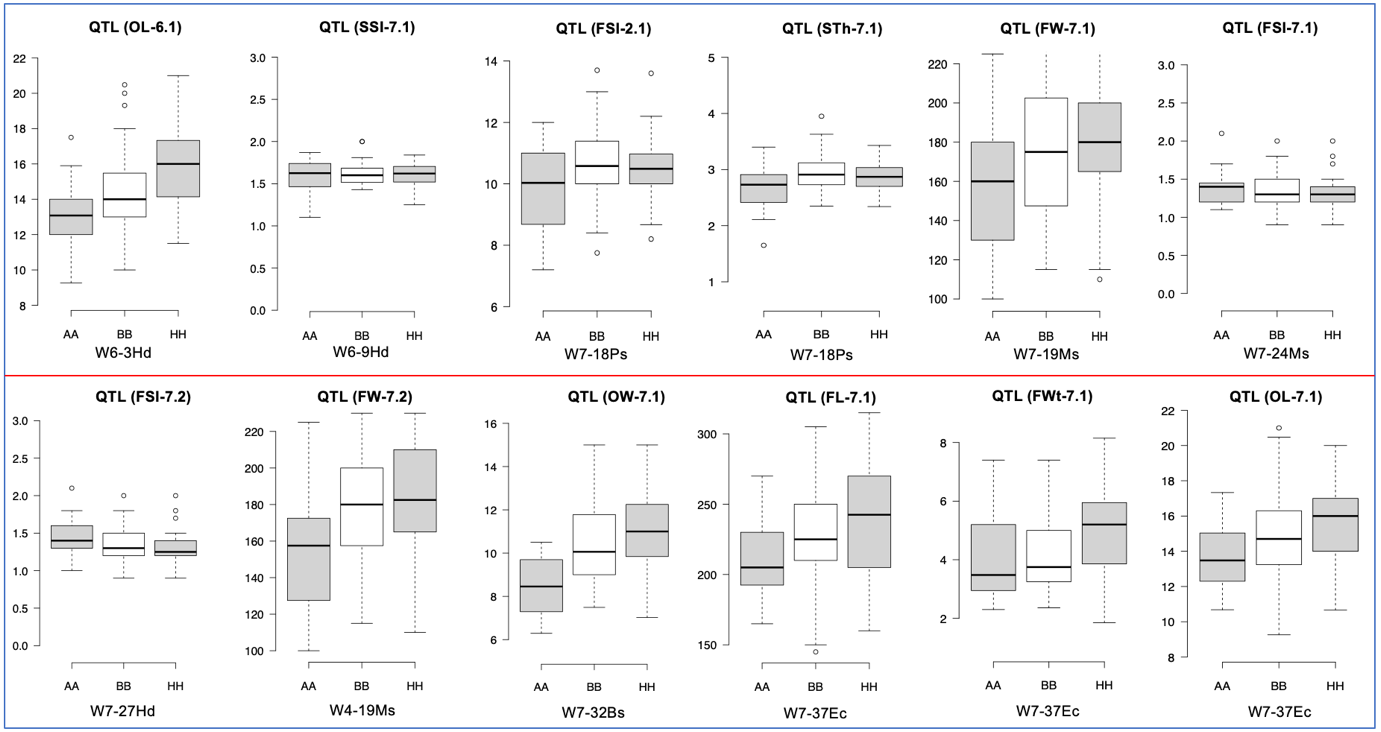


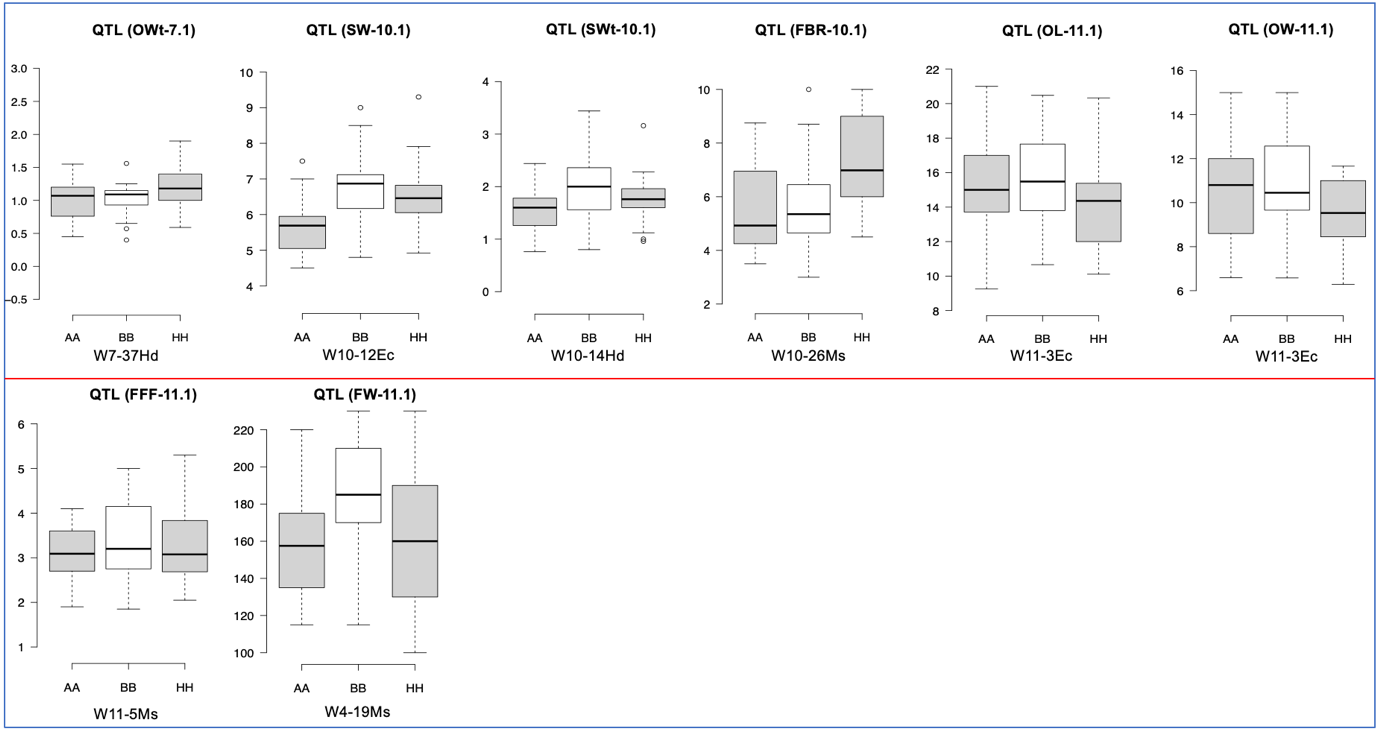


**Supplementary Figure S2 |** Box plots of SNP allelic effects underlying identified QTLs of ovary, fruit, and seed traits of watermelon.
